# Supplementary material for: Establishing a productive heterogeneous catalyst based on silver nanoparticles supported on a crosslinked vinyl polymer for the reduction of nitrophenol
Source: Royal Society of Chemistry journal article supplement (doi:10.1039/d4ra05186f), 2024-01-01
Supplement: d4ra05186f1.pdf [file d4ra05186f1.pdf]

## Supplementary information

# Establishing Productive Heterogeneous Catalyst based on Silver Nanoparticles Supported on Crosslinked Vinyl Polymer for Reduction of Nitrophenol

Y.A. Aggour <sup>a</sup>, El-Refaie Kenawy <sup>b</sup>, Marwa Magdy <sup>a</sup>, Elsayed Elbayoumy <sup>a\*</sup>

<sup>a</sup> Chemistry Department, Faculty of Science, Damietta University, New Damietta 34517, Egypt.

<sup>b</sup> Polymer Research Group, Chemistry Department, Faculty of Science, Tanta University, Tanta 31527, Egypt.

Corresponding author: Elsayed Elbayoumy Email: [sayedelbayoumy@du.edu.eg](mailto:sayedelbayoumy@du.edu.eg)

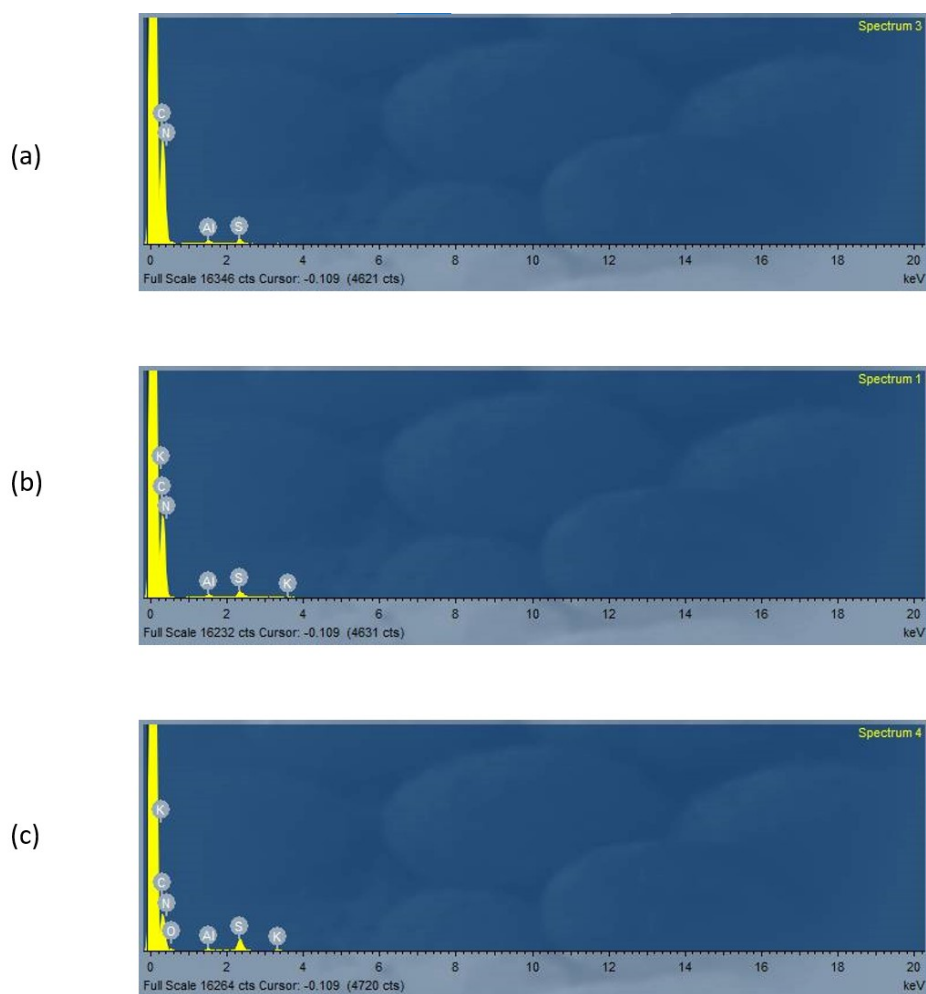

**Figure S1.** . EDX analysis for (a) poly(AMPS-co-AN) (Run 1 in table1), (b) poly(AMPS-co-AN) (Run2 in table 1), (c) poly(AMPS-co-AN) (Run3 in table 1).

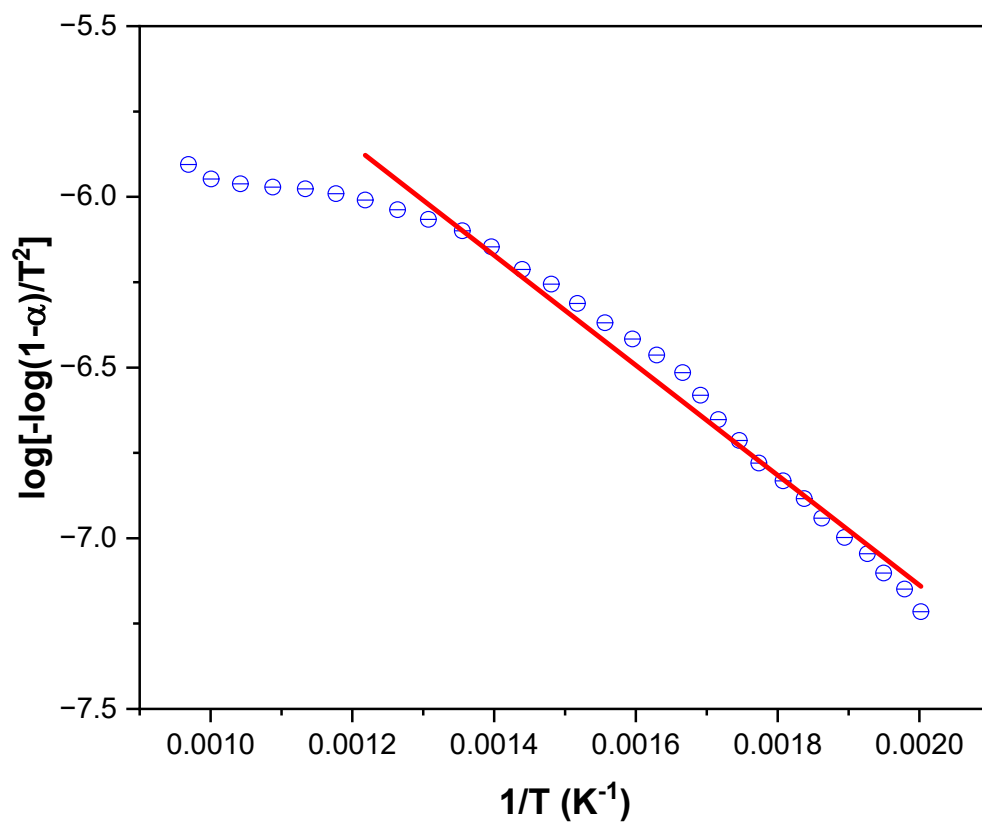

**Figure S2.** Coats-Redfern relationship for poly(AN-co-AMPS).

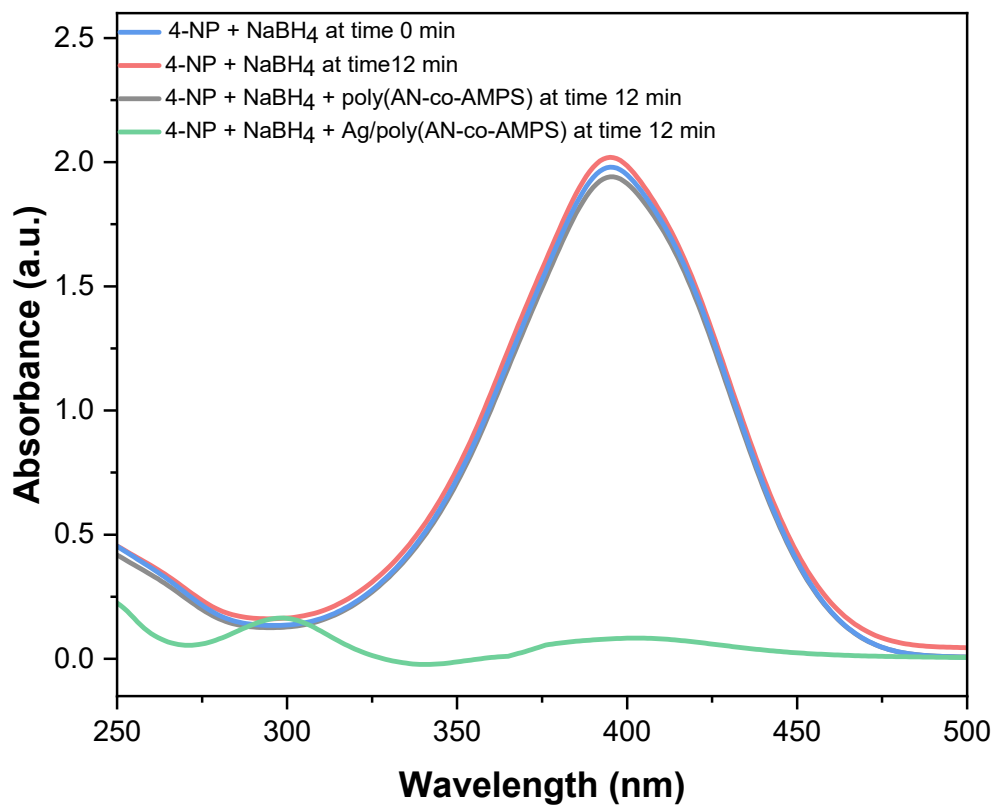

**Figure S3.** UV-vis spectra of the reduction of 4-NP to 4-AP. Reaction conditions: [4-NP] = 0.1 mM, [NaBH<sub>4</sub>] = 10 mM, and wt. of catalyst 20 mg.
